# Supplementary material for: Cyclophosphamide, Bortezomib, and Dexamethasone Consolidation in Patients with Multiple Myeloma after Stem Cell Transplantation: The KMM130 Study
Source: PubMed Central journal article supplement — Cancer Res Treat. 2022 Nov 16;55(2):693–703. doi: 10.4143/crt.2022.952 (PMC10101807; doi:10.4143/crt.2022.952), 2022-11-16
Supplement: crt-2022-952-Supplementary-Fig-3.pdf [file crt-2022-952-Supplementary-Fig-3.pdf]

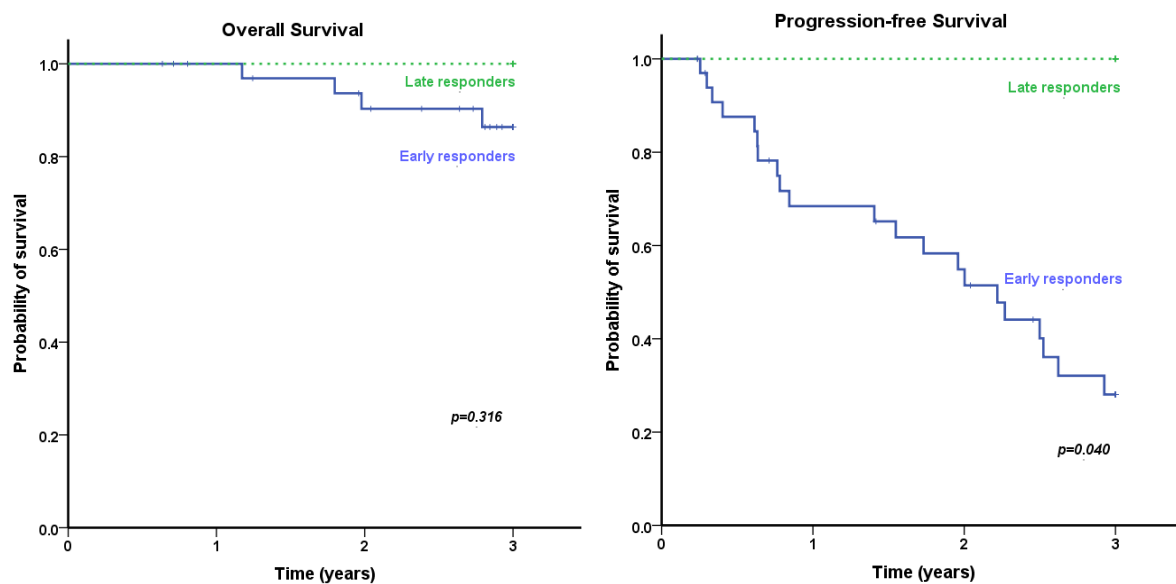

**S3 Fig.** Kaplan-Meier curves of overall survival and progression-free survival following the consolidation chemotherapy comprising cyclophosphamide, bortezomib, and dexamethasone after autologous stem cell transplantation, according to time to best response.
